## FRONT MATTER

### Title

**EGF signaling in bowel carcinoma cells utilizes higher order architectures of EGFR and HER2**

### Short title

**EGF signaling in bowel carcinoma cells**

### Authors

Adam J. M. Wollman<sup>1,2†</sup>, Charlotte Fournier<sup>3,4, †</sup>, Isabel Llorente-Garcia<sup>5, †</sup>, Oliver Harriman<sup>3, †</sup>, Alex L. Hargreaves<sup>1</sup>, Sviatlana Shashkova<sup>1,6</sup>, Peng Zhou<sup>7</sup>, Ta-Chun Liu<sup>8</sup>, Djamila Ouaret<sup>8</sup>, Jenny Wilding<sup>8</sup>, Akihiro Kusumi<sup>7</sup>, Walter Bodmer<sup>8</sup> and Mark C. Leake<sup>1,9,\*</sup>

### Affiliations

<sup>1</sup> Department of Physics, University of York, York, United Kingdom.

<sup>2</sup> Current address: Biosciences Institute, Newcastle University  
NE2 4HHO, United Kingdom.

<sup>3</sup> Department of Physics, Clarendon Laboratory, University of Oxford, Oxford OX1 3PU, United Kingdom.

<sup>4</sup> Current address: Okinawa Institute of Science and Technology Graduate University, 119-1 Tancha, Onna-son, Kunigami-gun, Okinawa, Japan 904-0495.

Okinawa Institute of Science and Technology Graduate University, 119-1 Tancha, Onna-son, Kunigami-gun, Okinawa, Japan 904-0495.

<sup>5</sup> Current address: Department of Physics and Astronomy, University College London, Gower Street, London WC1E 6BT, United Kingdom

<sup>6</sup> Current address: Department of Microbiology and Immunology, Institute for Biomedicine, Sahlgrenska Academy, University of Gothenburg, 405 30 Gothenburg, Sweden.

<sup>7</sup> Membrane Cooperativity Unit, OIST, Onna-son, Japan.

<sup>8</sup> MRC Weatherall Institute of Molecular Medicine, University of Oxford, John Radcliffe Hospital, Oxford OX3 9DS, United Kingdom.

<sup>9</sup> Department of Biology, University of York, York, United Kingdom.

† These authors contributed jointly to this work

\* Correspondence should be addressed to M.C.L: [mark.leake@york.ac.uk](mailto:mark.leake@york.ac.uk)

### Abstract

Epidermal growth factor (EGF) signaling regulates normal cell development, however EGF receptor (EGFR) overexpression is reported in several carcinomas. Despite structural and biochemical evidence that EGF-EGFR ligation activates signaling through monomer-dimer transitions, live cell mechanistic details remain contentious. We report single-molecule multispectral TIRF of human epithelial carcinoma cells transfected with fluorescent EGFR, and of CHO-K1 cells containing fluorescent EGFR and HER2, enabling super-resolved localization to quantify receptor architectures and spatiotemporal dynamics upon EGF ligation. Using inhibitors that block binding to EGFR, and time-dependent kinetics modelling, we find that pre-activated EGFR consist predominantly of preformed clusters that contain a mixture of EGFR and HER2, whose stoichiometry increases following EGF activation. Although complicated by EGFR internalization and recycling, our observation of an EGFR:EGF stoichiometry >1 for plasma

51 membrane colocalized EGFR/EGF foci soon after activation may indicate preferential binding of  
52 EGF ligand to EGFR monomers, negative cooperativity and preferential ligated-unligated  
53 dimerization of monomers.

## 54 55 MAIN TEXT

### 56 57 Introduction

58 Epidermal growth factor receptor (EGFR) is essential for epithelial tissues and several signaling  
59 pathways, its upregulation is implicated in several carcinomas(1). Human EGFR or ERBB1,  
60 ('ErB1' or 'HER1') is a protein of receptor tyrosine kinase (RTK) family with three other ERBB  
61 members, ERBB2 ('ErbB2' or 'HER2'), ERBB3 ('ErbB3' or 'HER3') and ERBB4 ('ErbB4' or  
62 'HER4'), expressed in plasma membranes of epithelial cells(2). EGFR has an extracellular  
63 region, with subdomains I-IV of which I and III participate in ligand binding(3), connected to a  
64 cytoplasmic domain containing a tyrosine kinase.

65 EGFR activation requires ligand binding, receptor-receptor interactions, and tyrosine  
66 kinase activity with 11 different ligands binding to ERBB proteins, including EGF which binds to  
67 EGFR(4). Subsequent autophosphorylation of intracellular residues initiate reactions stimulating  
68 cell growth, differentiation and proliferation, terminated by internalization and proteolytic  
69 degradation of receptor-ligand(5).

70 Much is known about interactions that contribute to signal transduction, however,  
71 controversy remains concerning *in vivo* EGFR composition before and after activation and the  
72 roles of higher order complexes. Small angle X-ray scattering and isothermal titration calorimetry  
73 to EGFR's isolated extracellular domain (sEGFR) suggest EGF binds to sEGFR monomers,  
74 receptor dimerization involving association of two monomeric EGF-sEGFR(6). Multi-angle laser  
75 light scattering suggests sEGFR is monomeric in solution but dimeric after EGF ligation(7).  
76 Fluorescence anisotropy indicates 1:1 binding of EGF:sEGFR, analytical ultracentrifugation  
77 suggesting 2(EGF-sEGFR) complexes(8). Structural evidence indicates activation is preceded by  
78 ligand binding to receptor monomers such that EGF induces conformational change by removing  
79 interactions that autoinhibit dimerization(9) (positive cooperativity). However, binding studies of  
80 full length receptors suggest reduced affinity for subsequent binding (negative cooperativity)  
81 mediated through an intracellular juxta-membrane domain(10). It has been shown that EGFR  
82 dimers with a single bound EGF can be phosphorylated(11). A prediction from negative  
83 cooperativity is that EGFR:EGF complexes have a nominal relative stoichiometry of 2:1(12).

84 Similarly, the first single-molecule fluorescence imaging studies in cells suggested  
85 binding of one EGF to a preformed EGFR dimer, rapidly followed by a second to form a 2:2  
86 complex(13). Förster resonance energy transfer (FRET) suggest preformed oligomeric EGFR(14)  
87 supported by autocorrelation analysis(15), bimolecular fluorescence complementation  
88 (BiFC)(16), and pixel brightness analysis of GFP-labelled EGFR(17). Recent light microscopy  
89 advances have yielded new insights in conformational changes in EGFR rotation(18). More recent  
90 single-molecule analyses of GFP-labelled CHO cells suggest EGFR forms oligomers prior to  
91 EGF binding, triggered at physiological EGF levels(19), contrasting with findings in live *Xenopus*  
92 oocytes that report mostly monomeric EGFR before activation(20). EGFR clustering is nuanced  
93 since it may involve cooperativity not only between EGFR subunits but also other ERBB  
94 proteins(16). EGFR's oligomeric state before and after activation under physiological conditions  
95 remains an open question due to limitations in obtaining simultaneous data on stoichiometries of  
96 interacting receptors and ligands, dependence of EGF expression on EGFR oligomerization, the  
97 presence of fluorescently labelled and dark EGFR, and species-specific cell line differences.

98 We investigated a human epithelial carcinoma cell line, with negligible native EGFR  
99 protein(21), to improve our understanding of EGF binding to EGFR in cancer. We use single-  
100 molecule total internal reflection fluorescence (TIRF) on live human colorectal carcinoma cells

101 into which GFP-labelled EGFR had been stably transfected, coupled to nanoscale tracking of  
102 tetramethylrhodamine (TMR) stoichiometrically conjugated to EGF (fig. 1A) both in the presence  
103 and absence of popular immunotherapy antibodies which inhibit EGF signaling. We find EGFR  
104 forms oligomeric clusters prior to EGF binding with a peak stoichiometry of 6. After EGF  
105 ligation, measurements of cluster mobility in the presence of inhibitors which target HER2  
106 suggest they contain clusters of both EGFR and HER2, consistent with subsequent TIRF on a  
107 dual-label CHO-K1 cell line which shows EGFR and HER clusters interact transiently even  
108 before EGF activation with a dwell time of several hundred milliseconds. Following EGF ligation  
109 we see evidence for a relative EGFR:EGF stoichiometry greater than 1 (~2:1 considering the ratio  
110 of modal averages, ~4:1 from the ratio of mean averages of stoichiometry). Kinetics modelling  
111 suggests a combination of preferential binding of ligand to receptor monomers, negative  
112 cooperativity for EGFR activation by EGF(22) and preferential ligated-unligated dimerization of  
113 monomers.

## 114 **Results**

115 **Construction of EGFR-GFP cells.** Human cell line SW620 was selected from a colorectal  
116 carcinoma library for low endogenous EGFR expression as quantified by microarray(23) (fig.  
117 S1A). EGFR protein was undetectable by western blotting (fig. 1B). SW620 was stably  
118 transfected with plasmid pEGFR-EGFP-N1 to give SW620-EGFR-GFP, GFP tagging the  
119 cytoplasmic domain far from the EGF binding site. The construct's kinase activity was confirmed  
120 by observing increased phosphorylation of ERK1/2 kinases, EGFR downstream targets, in  
121 response to EGF (fig. S1B). RT-qPCR indicated endogenous expression of *HER2*, *HER3* and  
122 *HER4* comparable to *EGFR* in the parental SW620, and the construct did not cause significant  
123 changes in their expression (fig. 1SC). Live cell confocal fluorescence microscopy confirmed  
124 plasma membrane localization (fig. S1C), with immunofluorescence on fixed cells using  
125 AlexaFluor633-labelled anti-EGFR and anti-GFP antibodies demonstrating colocalization of GFP  
126 and EGFR (fig. S2A-D).  
127

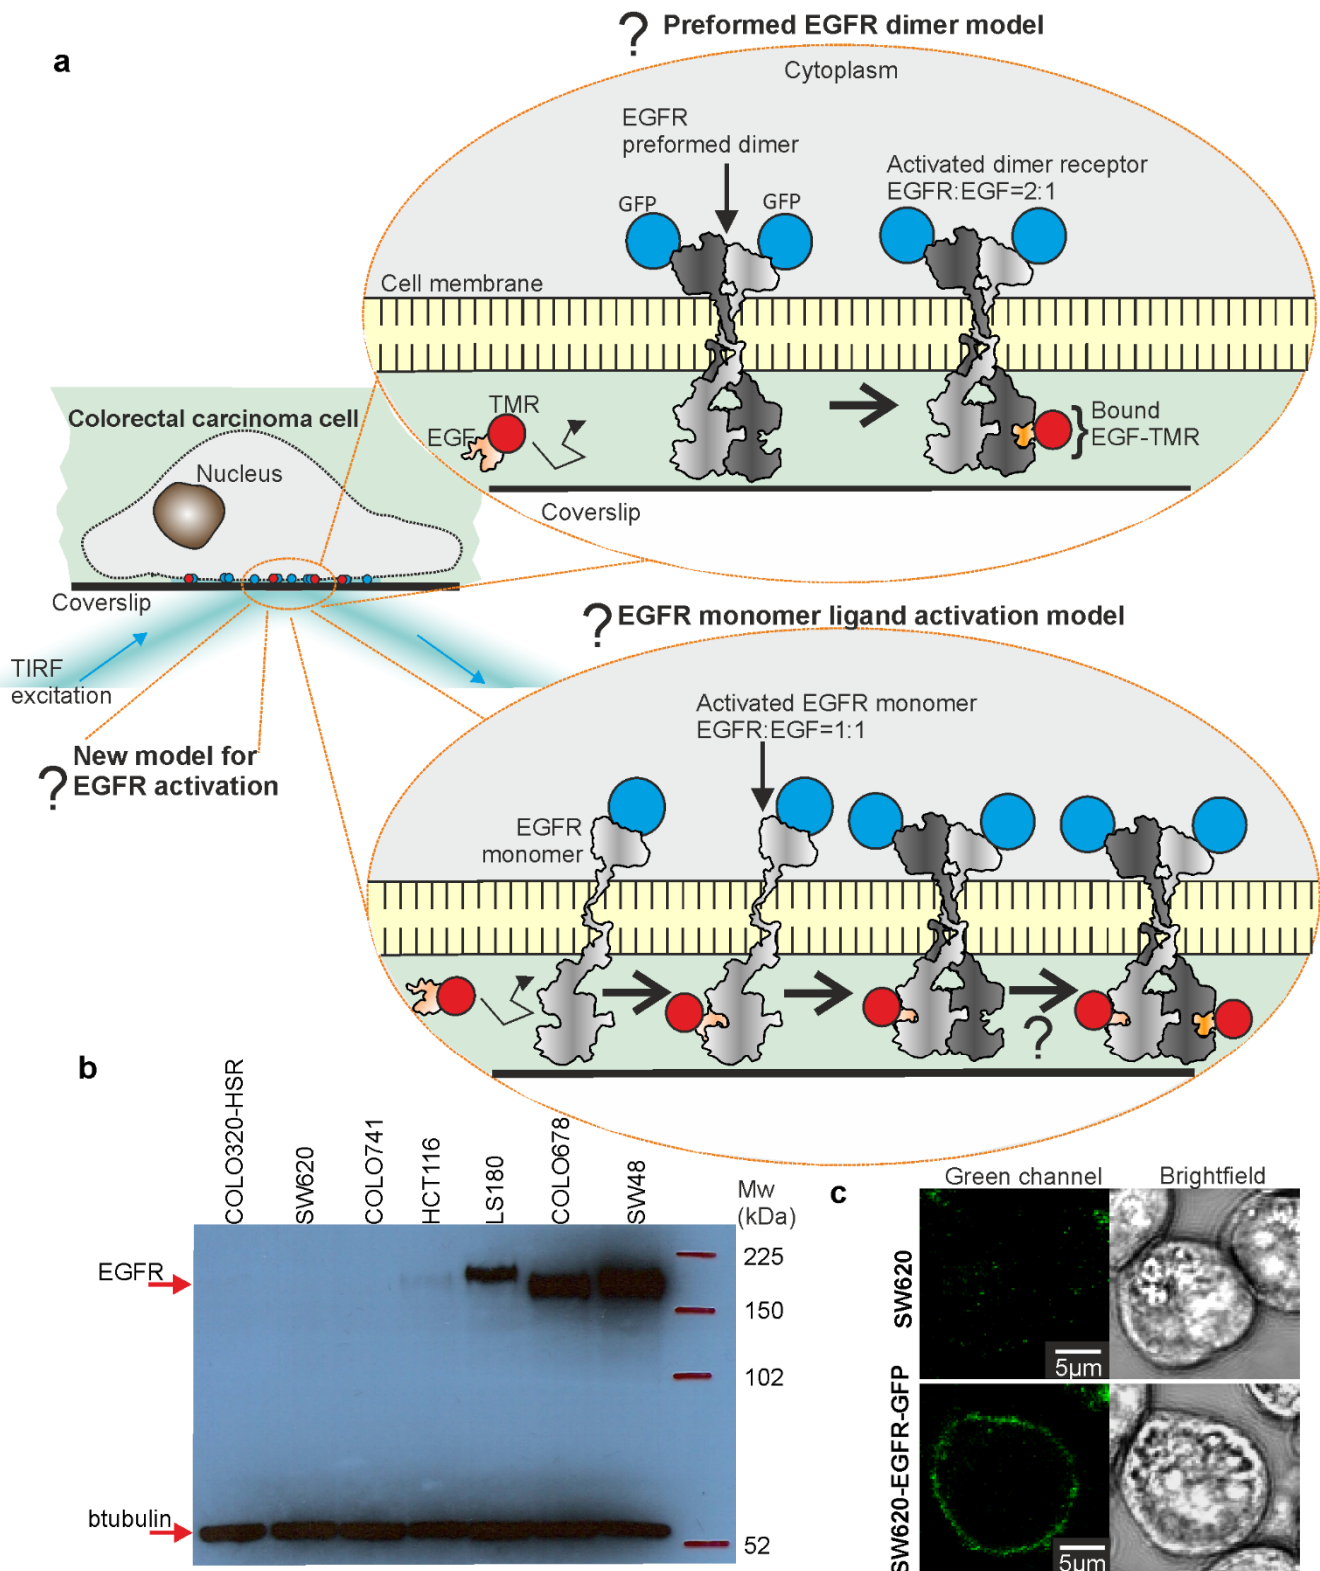

**Figure 1. Visualizing EGF-EGFR in human carcinomas.** (A) TIRF applied to colorectal carcinoma cells. Several models to explain EGFR activation are postulated, including ‘monomer’ and ‘preformed dimer’ models (EGF structure PDB ID 1egf; EGFR monomer and dimer cartoons have been generated by manually combining separate structures with PDB ID values of 1nql, 1ivo, 2jwa, 1m17 and 2gs6). (B) SDS-PAGE for candidate colorectal carcinoma cell lines, indicating SW620 COLO320-HSR (as opposed to COLO320-DM, its duplicate line) and COLO741 (later found to be a melanoma and not subsequently used) have negligible endogenous EGFR expression compared to positive controls HCT116, LS180, COLO678 and SW48. (C)



137 Parental SW620 shows minimal autofluorescence (upper left), while SW620-EGFR-GFP show  
138 plasma membrane localization for EGFR-GFP (lower left) from confocal imaging of cells soon  
139 after adhering to the coverslip surface focusing at mid-cell-height, fluorescence intensity inside  
140 cells comparable to SW620.

141  
142 **TIRF optimized for single-molecule EGF/EGFR detection.** We optimized a bespoke TIRF  
143 microscope (fig. S2E) for single-molecule detection using a surface assay(24) in which GFP or  
144 EGF-TMR was conjugated to a glass coverslip using IgG/Fab with binding specificity to GFP or  
145 EGF (fig. 2A and fig. S3A). After ~1s laser illumination, foci exhibited step-wise photobleaching  
146 (fig. 2B), indicative of single GFP or TMR, each with a brightness (summed pixel intensity) of  
147 ~2,000 counts on our detector (fig. S3B).

148 **Tracked EGFR are oligomeric before EGF binds.** Before adding EGF in serum-free medium  
149 we observed fluorescent foci at a surface density of 0.1-0.4 per  $\mu\text{m}^2$  in the plasma membrane  
150 (fig.2C and fig. S4A). In most cells foci could be detected across the full extent of the basal  
151 membrane and exhibited a smooth surface consistent with earlier SEM imaging performed on the  
152 SW620 cell line(21), though in a few which exhibited finger-like filopodia protrusions of the  
153 membrane we saw a small localization bias towards the cell peripheries. We detected a mean  
154  $66\pm 28$  (s.d.) foci per cell and monitored their spatiotemporal dynamics over several seconds with  
155 40nm precision using super-resolved tracking(25), indicating both mobile and immobile foci  
156 (movie S1). Foci widths were within 10% of those observed for single GFP *in vitro* (~250nm half  
157 width at half maximum). However, brightness was greater than that expected for monomeric  
158 GFP, exhibiting stochastic photobleaching steps (fig.2D), which we used to determine  
159 stoichiometry by dividing the initial brightness by that of single GFP(24). To determine GFP  
160 brightness we quantified mean foci brightness towards the end of each photobleach, when only  
161 one photoactive molecule remained, indicating live cell values within 15% of that *in vitro* (fig.  
162 S3B). Previous live cell measurements using the same fluorescent protein indicate the proportion  
163 of immature GFP is <15% of the total(26). We measured a broad range of stoichiometry, across  
164 different cells and within the same cell, of 2-90 EGFR molecules per focus, with peak value ~6  
165 and mean  $12.8\pm 0.4$  molecules ( $\pm$ s.e.m.) (fig. 2E).

166 We could not detect any monomeric EGFR-GFP before adding EGF, despite our  
167 microscope having single GFP sensitivity *in silico* (fig. S4B) and *in vitro* under the same imaging  
168 conditions, from >1,000 tracks in 19 different cells. We wondered if random overlap of EGFR-  
169 GFP diffraction-limited images which are not physically in the same cluster could account for the  
170 apparent stoichiometries of EGFR. We modelled this phenomenon by convolving overlap  
171 probability(27) (Methods) with the brightness distribution of a cluster in a range of different  
172 oligomeric states from monomers through to tetramers (suggested from a previous single-  
173 molecule study(19)), which resulted in very poor agreement to the observed data (fig. S4C  $R^2 < 0$ ).  
174 However, simulating cluster stoichiometry using a random Poisson distribution whose mean was  
175 equal to 6 molecules resulted in reasonable predictions which could account for approximately  
176 50% of the observed variance in the experimental stoichiometry distribution ( $R^2=0.4923$ , fig.  
177 S4D).

178 By quantifying summed TIRF pixel intensities for SW620-EGFR-GFP, correcting for  
179 autofluorescence and cell area (Methods), we measured the mean EGFR-GFP copy number in the  
180 plasma membrane as  $200,000\pm 11,000$  molecules per cell ( $\pm$ s.e.m.). The 100nm TIRF penetration  
181 depth we calculate will illuminate approximately 1/3 of the cell's plasma membrane (the planar  
182 basal membrane in contact with the coverglass plus a portion of the curved membrane away from  
183 the surface), so the maximum EGFR-GFP content visible is ~67,000 molecules per cell, whereas  
184 what we actually track is ~1% of this. We calculate that the maximum stoichiometry of foci  
185 which are not detected as distinct foci is approximately a few tens of molecules (Methods),  
186 however, we cannot directly exclude the possibility that monomeric EGFR are present.

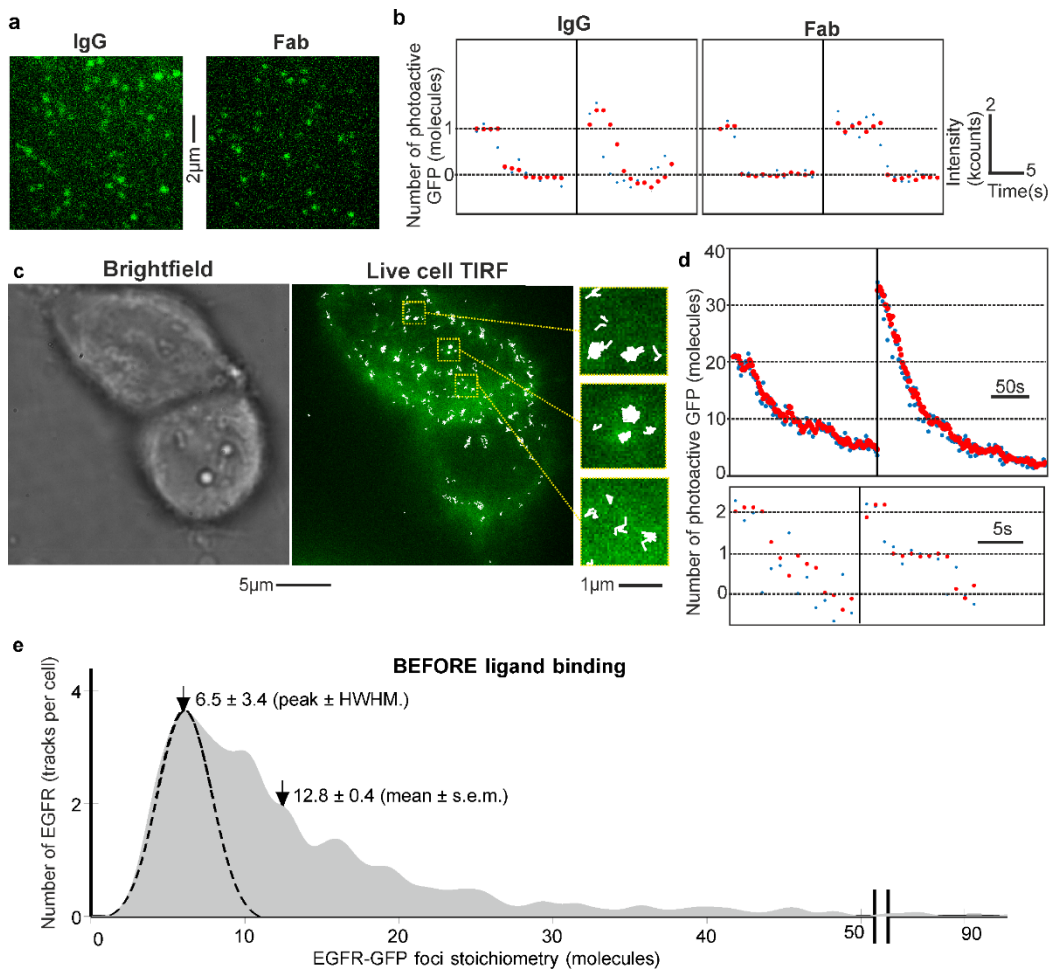

**Figure 2. EGFR stoichiometry before EGF binds.** (A) TIRF of GFP *in vitro* using IgG/Fab conjugation. (B) Step-wise photobleaching showing raw (blue) and output data of an edge-preserving filter(28) (red), kilocounts equivalent to counts on our detector  $\times 10^3$ . (C) Two SW620-EGFR-GFP cells showing GFP (green) and overlaid tracking (white) with zoom-ins (inset). (D) Photobleaches from tracked EGFR-GFP with stoichiometries of several tens (upper), down to a minimum of two (lower). (E) Distribution of EGFR-GFP stoichiometry before EGF ligation showing peak at  $\sim 6$  and mean 12.8 molecules,  $N=19$  cells,  $N=1,250$  tracks in total ( $\sim 66$  tracks per cell), corresponding to mean of approximately 850 tracked EGFR per cell.

**Mean relative stoichiometry of EGFR to ligated EGF is 4:1.** To determine the effect of EGF binding on EGFR stoichiometry and spatiotemporal dynamics, live SW620-EGFR-GFP and non-GFP controls were first kept in serum-free media for 24h to minimize binding of serum-based EGFR ligands. We visualized cells using TIRF then added EGF-TMR, enabling simultaneous observation of EGFR and EGF in green/red color channels, before and after EGF ligation. Excess EGF-TMR was retained in the sample during imaging enabling observations over incubation times from 3-60min. We observed a mean of  $\sim 57$  EGFR tracks per cell across all incubation times from 117 cells, similar to the  $\sim 66$  tracks per cell observed when EGF was absent, from 19 cells (table S1). Colocalization of EGFR and EGF foci was determined using numerical integration between overlapping green/red foci(27).

After EGF incubation from a few minutes, colocalization between green/red foci was detected (fig. 3A, movie S2 and fig. S5A). We estimated a mean  $\sim 15$  foci per cell ( $40 \pm 18\%$  of foci) were colocalized EGF-EGFR for 3-60min incubation. This value corresponds to 64% of all tracked EGFR molecules (fig. 3B,C). Colocalized EGF-EGFR foci had a higher mean stoichiometry (Student's *t*-test  $P < 0.0001$ ) of 31 (table S1) compared to unligated clusters whose

212 mean was 11, consistent with measurements made before adding EGF (fig.3D). The mean  
213 stoichiometry of unligated EGFR clusters remained roughly constant at 8-14 during incubation  
214 with EGF (fig.3E), compared to that of colocalized EGF-EGFR of approximately 20-40. Total  
215 EGFR-GFP copy number on the cell surface remained broadly constant after EGF was added (fig.  
216 S5C), implying that we mostly measure steady-state of endocytosis and recycling processes(29).  
217 Results from our kinetics model, discussed below, support this.

218 EGF-TMR *in vitro* using conjugation to coverslips exhibited step-wise photobleaching  
219 similar to GFP (fig. S3B). To determine the relative stoichiometry between EGFR and EGF when  
220 EGF was bound we measured red foci stoichiometry simultaneously to colocalized green foci,  
221 revealing a peak relative stoichiometry for EGFR:EGF of  $1.9 \pm 0.8$  ( $\pm$ half width half maximum,  
222 fig. 3F) with mean relative stoichiometry  $4.2 \pm 0.1$ . The width of the fitted Gaussian underneath the  
223 2:1 peak was consistent with variability in the GFP and TMR brightness we measured *in vitro*.  
224 Sub-dividing data by incubation time revealed no significant shift in relative stoichiometry from  
225 the 2:1 peak (fig. S5B). Before EGF-TMR was added in controls to the parental strain we  
226 detected rare autofluorescent foci resulting in pseudo colocalization of 2-3 tracks per cell (<3% of  
227 colocalized tracks), resulting in a small peak for apparent relative stoichiometry in green:red  
228 channels of  $\sim 0.5:1$  (fig. S5D) thus having negligible impact on the 2:1 peak. Adding EGF-TMR  
229 to this strain resulted in the appearance of random foci in the red channel indistinguishable to that  
230 in the absence of EGF-TMR (Student's *t*-test  $P > 0.05$ ).

231 Our observation of a peak EGF:EGFR stoichiometry ratio of 2:1 (mean 4:1) can be  
232 interpreted with a multi-state time-dependent kinetics model. Under the conditions of our  
233 experiments of relatively high EGF concentration, where we likely saturate EGFRs at the surface,  
234 the rate of internalization is 3-10%/min, dependent on cell line, and lower than at lower EGF  
235 concentrations owing to clathrin endocytosis pathway saturation. Recycling rates of ligand-  
236 occupied EGFR are  $\sim 10\%$ /min, with recycling contributing significantly to the overall receptor  
237 distribution only after a pool of endosomal EGFR is accumulated.

238 Our time-dependent model shows that on adding EGF, initial concentrations of unligated  
239 EGFR monomers ([R]) and dimers ([RR]) decrease while concentrations of ligated monomers  
240 ([RL]) and dimers (singly ligated [RRL] and doubly ligated [RRL2]) increase over the first 5min  
241 (fig. 4a). Endocytosis leads to accumulation of internalized ligated monomers ( $[RL]^{inside}$ ) and  
242 dimers ( $[RRL]^{inside}$ ) and doubly ligated dimers ( $[RRL2]^{inside}$ ) (dashed lines, Fig.4A) with EGFR  
243 recycling back to the plasma membrane contributing to equilibration of all concentrations after  
244 30-40min (fig. 4A). The fractional saturation on the surface,  $Y_{surface}$  (ratio of EGF:EGFR on the  
245 surface, excluding internalization) is inset on fig. 4A, its inverse at equilibrium predicting  
246 EGFR:EGF in the absence of cooperativity of  $\sim 1.5$ , significantly lower than our mean  $\sim 4$  ( $\sim 2$   
247 peak value). However, if we correct for the temperature of our experiments ( $37^\circ\text{C}$ ) and assume  
248 negative cooperativity, as previously reported(22), our model predicts  $Y_{surface} \sim 0.24$  which  
249 agrees with our experimental mean (i.e.  $\sim 1/4$ ) (fig. 4B). In light of our predictions, we can account  
250 for our data by a combination of negative cooperativity of binding, decreased affinity of ligand  
251 for dimers and reduced homo-dimerization on-rates (supplementary methods). These predictions  
252 could be consistent with initial EGF binding to monomeric EGFR to generate an activated state  
253 predisposed to dimerize with unligated EGFR. Our model, which accounts for recycling and  
254 endocytosis, enables rich interpretation of imaging data revealing insights that could not be  
255 achieved with time-independent models based solely on affinities and equilibrium constants. Fig.  
256 4C shows the contrast between EGF:EGFR versus ligand concentration predictions at  $37^\circ\text{C}$  and  
257  $4^\circ\text{C}$ ; this arises from the strong temperature dependence of receptor internalization and of  
258 receptor ligand binding and dimerization equilibrium constants (full details see supplementary  
259 methods).

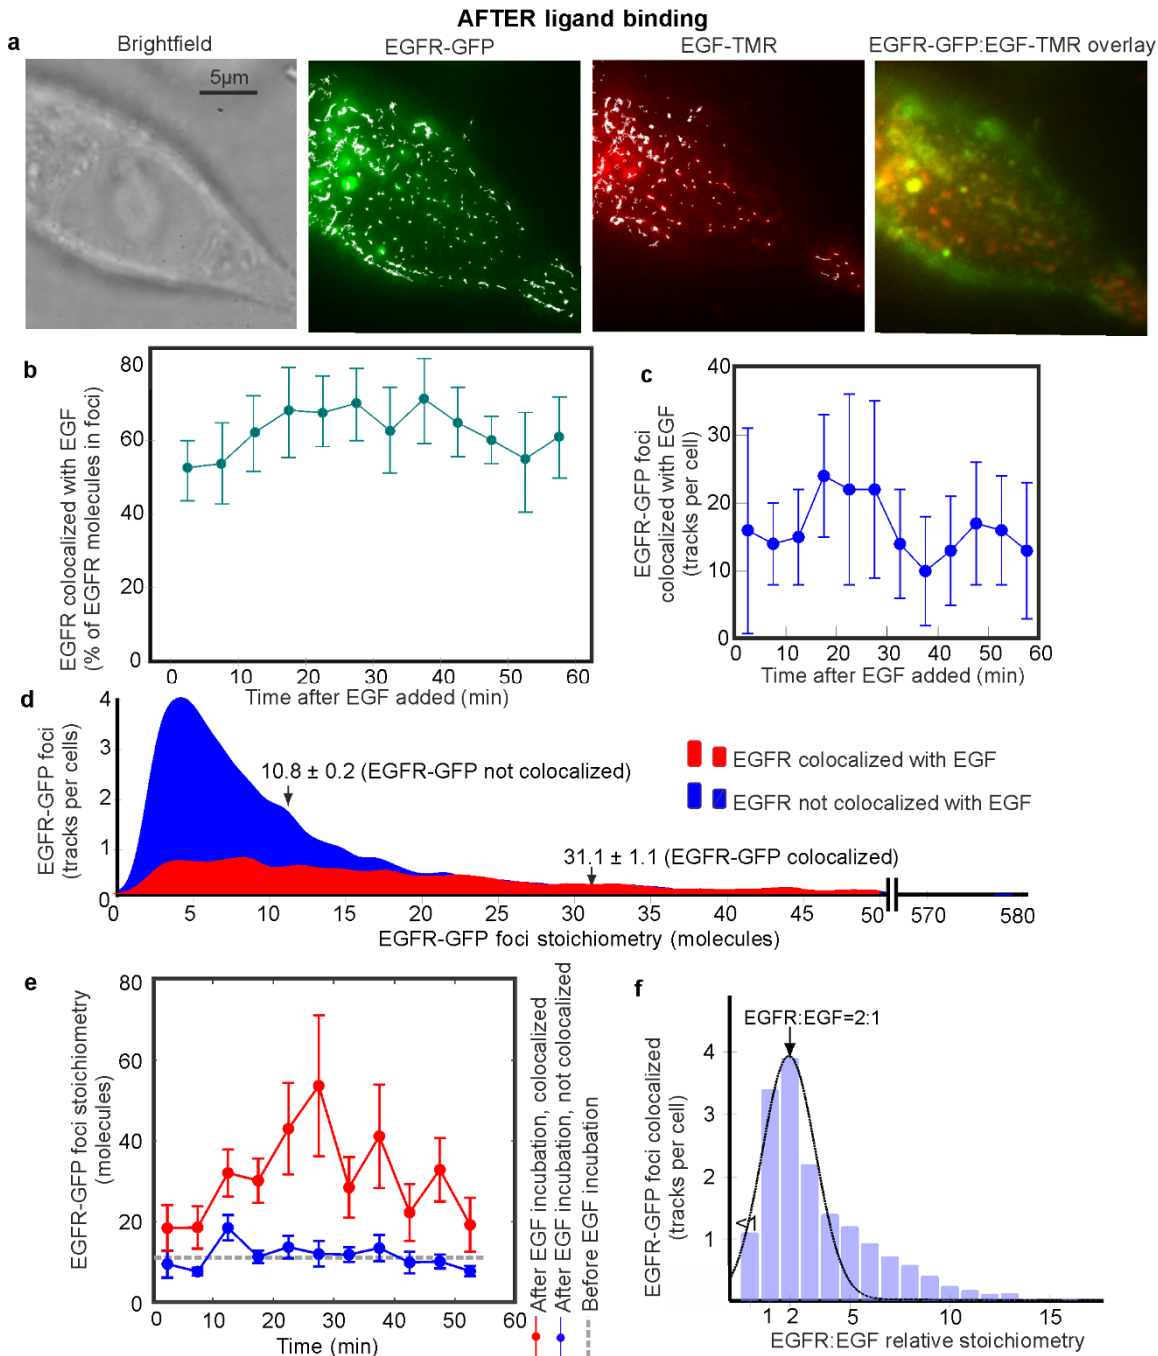

261 **Figure 3. EGF effect on EGFR stoichiometry.** (A) Brightfield and TIRF of SW620-EGFR-  
 262 GFP after adding EGF (~10min time point), GFP (green), TMR (red) and overlay images shown  
 263 (yellow indicates colocalization), tracking shown in white. (B) % of EGFR tracks colocalized to  
 264 EGF, (C) number of colocalized EGF-EGFR tracks detected per cell (s.d. error bars). (D)  
 265 Colocalized EGF-EGFR stoichiometry (red) and isolated foci (blue) across all times, mean and  
 266 s.e.m. indicated, and (E) vs. time (s.d. error bars). Cells categorized into 6min interval bins,  
 267 N=6-12 each bin. (F) Distribution of relative EGFR:EGF stoichiometry, overlaid Gaussian  
 268 indicated, N=119 cells.  
 269



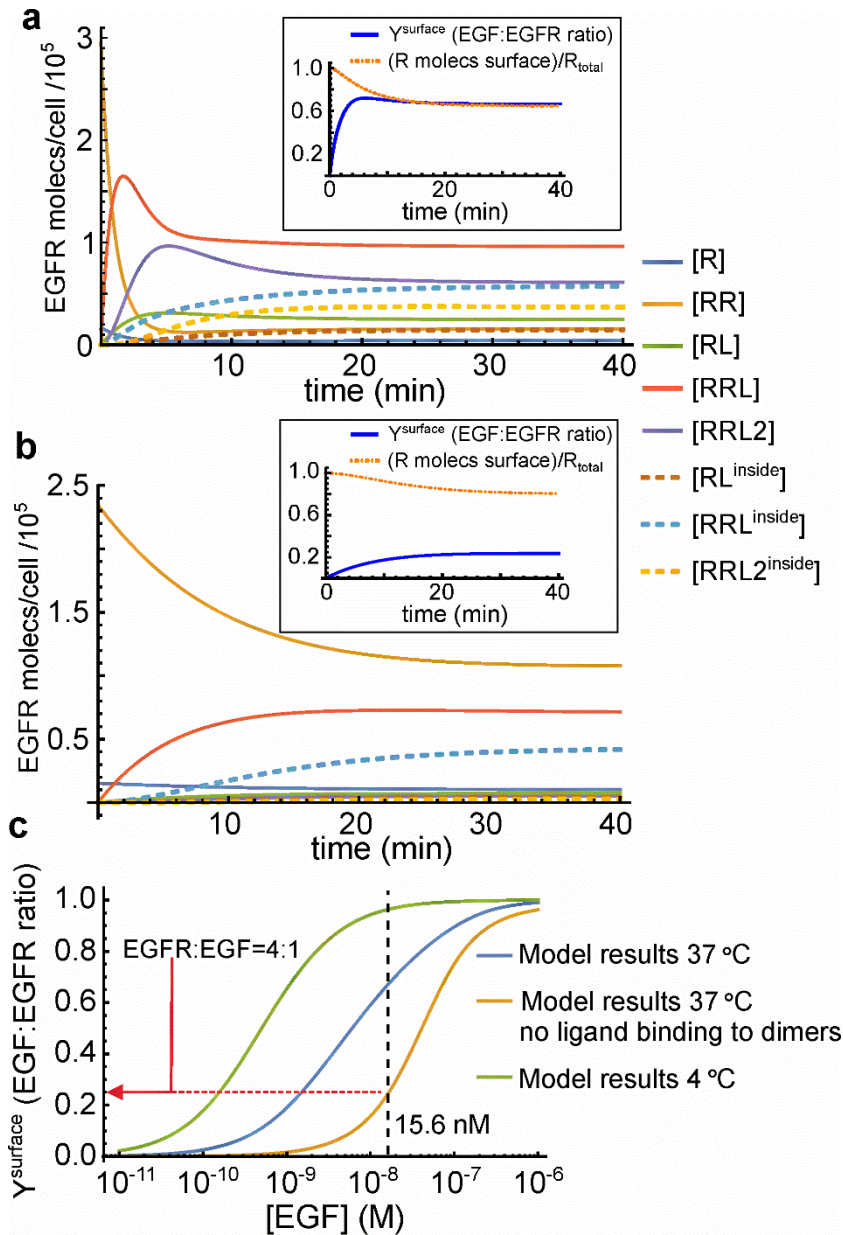

**Figure 4. Time-dependent EGFR-EGF binding model. (A)** Results of kinetics model for ligand binding to receptor monomers/dimers, dimerization, and endocytosis and recycling. Time dependence of receptor concentrations choosing parameters corresponding to 37°C. Inset:  $\gamma_{\text{surface}}$ . **(B)** Predictions for same parameters of (A) but assuming ligand binds only to monomers. **(C)** Equilibrium  $\gamma_{\text{surface}}$  versus EGF concentration for parameters shown in (A) and (B), and those at 4°C. Black dashed line: experimental EGF concentration, red line: equivalent value of EGFR:EGF that we measure experimentally.

**EGFR clustering affected by EGF inhibition.** To further understand the effect of EGF binding on EGFR clustering we performed TIRF in the presence of cetuximab or trastuzumab. Cetuximab is a monoclonal antibody anti-cancer drug commonly used against neck and colorectal cancers in advanced stages to inhibit cell division and growth(30). It binds to domain III of the soluble extracellular region of EGFR which is believed to result in partial blockage of the EGF binding region. This binding is believed to inhibit the receptor from adopting an extended conformation required for EGFR dimerization. Trastuzumab is a monoclonal antibody anti-cancer drug, commonly used to treat breast cancer(31); it has similar effects of inhibiting cell division and growth, however, it does not bind directly to EGFR but to domain IV of the extracellular segment

288 of HER2(32) that does not affect HER2 self-association(33) but influences the stability of HER2-  
289 mediated dimers with EGFR(34).

290 Before adding EGF we found that treatment with cetuximab or trastuzumab at cytostatic  
291 concentrations resulted in significant increases in the mean EGFR-GFP stoichiometry of 25% and  
292 65% (Student's *t*-test,  $P < 0.0001$ ) respectively (fig. 5A), but with no significant effect on the  
293 number of detected EGFR-GFP tracks per cell. Adding EGF resulted in ~20% fewer colocalized  
294 EGF-EGFR tracks for cetuximab- or trastuzumab-treated cells compared to untreated cells (fig.  
295 5B).

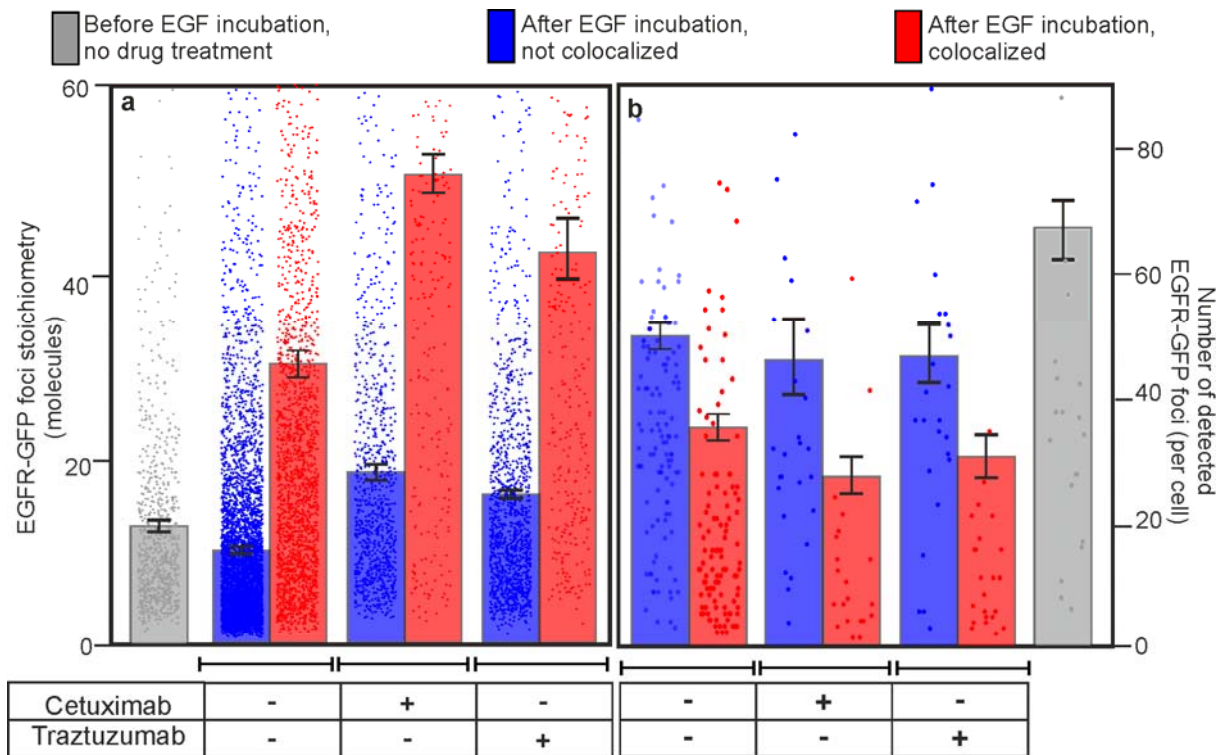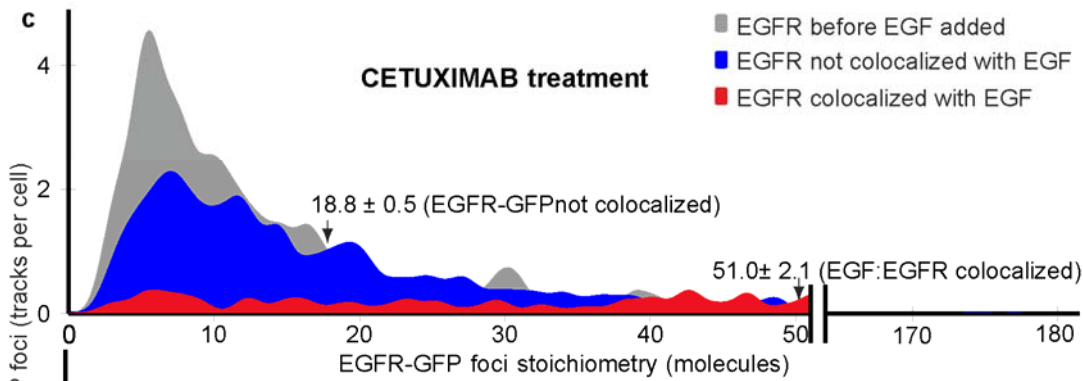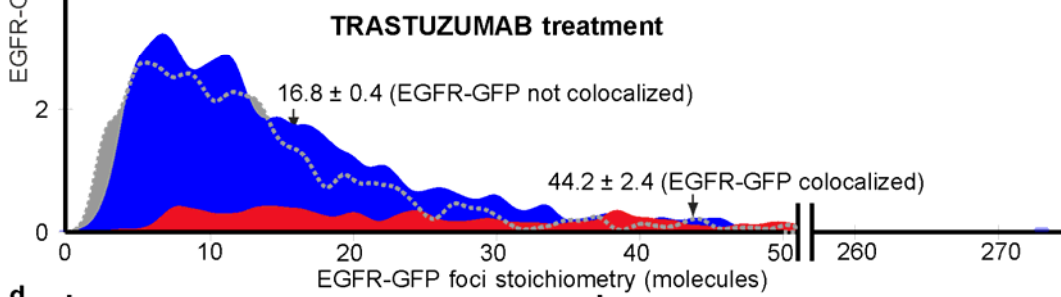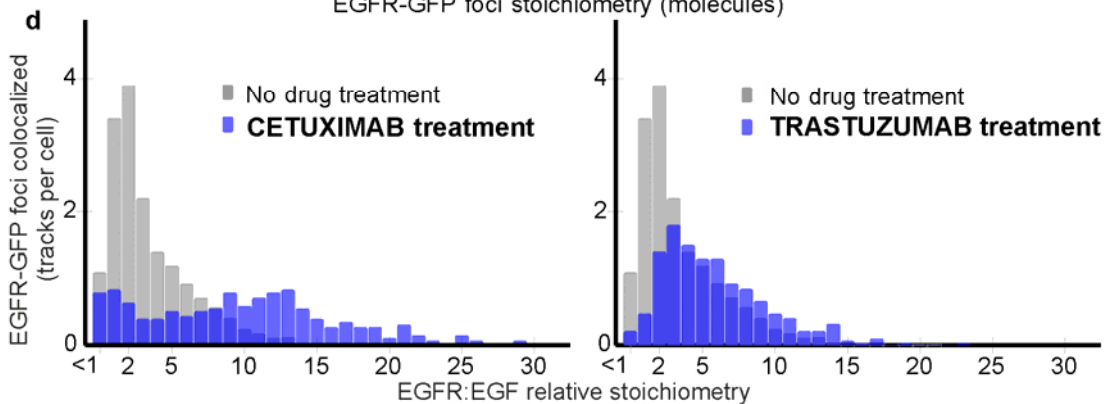

297 **Figure 5. Effect of cetuximab and trastuzumab on EGF colocalization with EGFR. (A)**  
298 Variation of mean EGFR-GFP foci stoichiometry, and **(B)** number of EGFR-GFP foci detected  
299 per cell. Colocalized EGF-EGFR (red) and isolated EGFR foci (blue) indicated for  $\pm$  addition of  
300 cetuximab and trastuzumab. Error bars s.d, N =10-117 cells per dataset. **(C)** Distribution of EGFR  
301 foci stoichiometry for cells treated with cetuximab or trastuzumab, showing pre (grey) and post  
302 EGF addition for colocalized EGF-EGFR (red) and isolated EGFR (blue) foci, data collated  
303 across 60min EGF incubation, mean and s.e.m. indicated. **(D)** EGFR:EGF relative stoichiometry  
304 of colocalized EGF-EGFR foci for drug-treated cells (blue) contrasted against no drug treatment  
305 (gray). N=10-117 cells per dataset.

306  
307 The mean colocalized EGF-EGFR foci stoichiometry in cetuximab and trastuzumab  
308 treatments was  $51 \pm 2$  and  $44 \pm 2$  respectively, with maxima of several hundred (fig. 5A,C). We also  
309 observe a shift to higher EGFR:EGF relative stoichiometry for cetuximab and trastuzumab  
310 treatments beyond the 2:1 peak observed for untreated cells (fig. 5D). The collapse of the peak at  
311 lower EGFR:EGF under cetuximab treatment reflects competitive binding with EGF. We also  
312 tested the inhibitor pertuzumab, a similar drug to trastuzumab albeit with complementary function  
313 against HER2/HER3 heteroassociation(35). Stoichiometry distributions were similar (fig. S9) to  
314 trastuzumab but full characterization is the subject of further study.

315  
316 **EGF triggers larger EGFR heterocluster formation.** Tracking of EGFR foci indicated  
317 Brownian diffusion up to time intervals of approximately 100ms (fig. 6A), while at longer times  
318 (fig. S6A) exhibiting transiently confined diffusion into zones of diameter 400-500nm (time  
319 intervals 100-600ms), and Brownian diffusion (time intervals >600ms). Using the initial gradient  
320 of the mean square displacement with respect to time interval for each track we determined the  
321 diffusion coefficient  $D$  and correlated this against EGFR foci stoichiometry. We used a simple  
322 model based on the Stokes-Einstein relation, in which the cross-sectional area of an EGFR cluster  
323 parallel to the plasma membrane scales linearly with the number of EGFR dimers present. The  
324 model assumes that  $D = k_B T / \gamma$  where  $k_B$  is Boltzmann's constant,  $T$  absolute temperature and  $\gamma$  drag  
325 of the cluster in the membrane. Drag is proportional to the effective radius of the cluster, implying  
326  $D$  is proportional to the reciprocal of the square root of the stoichiometry. Our model results in  
327 reasonable agreement for data corresponding to pre and post EGF incubation (fig. 6B).



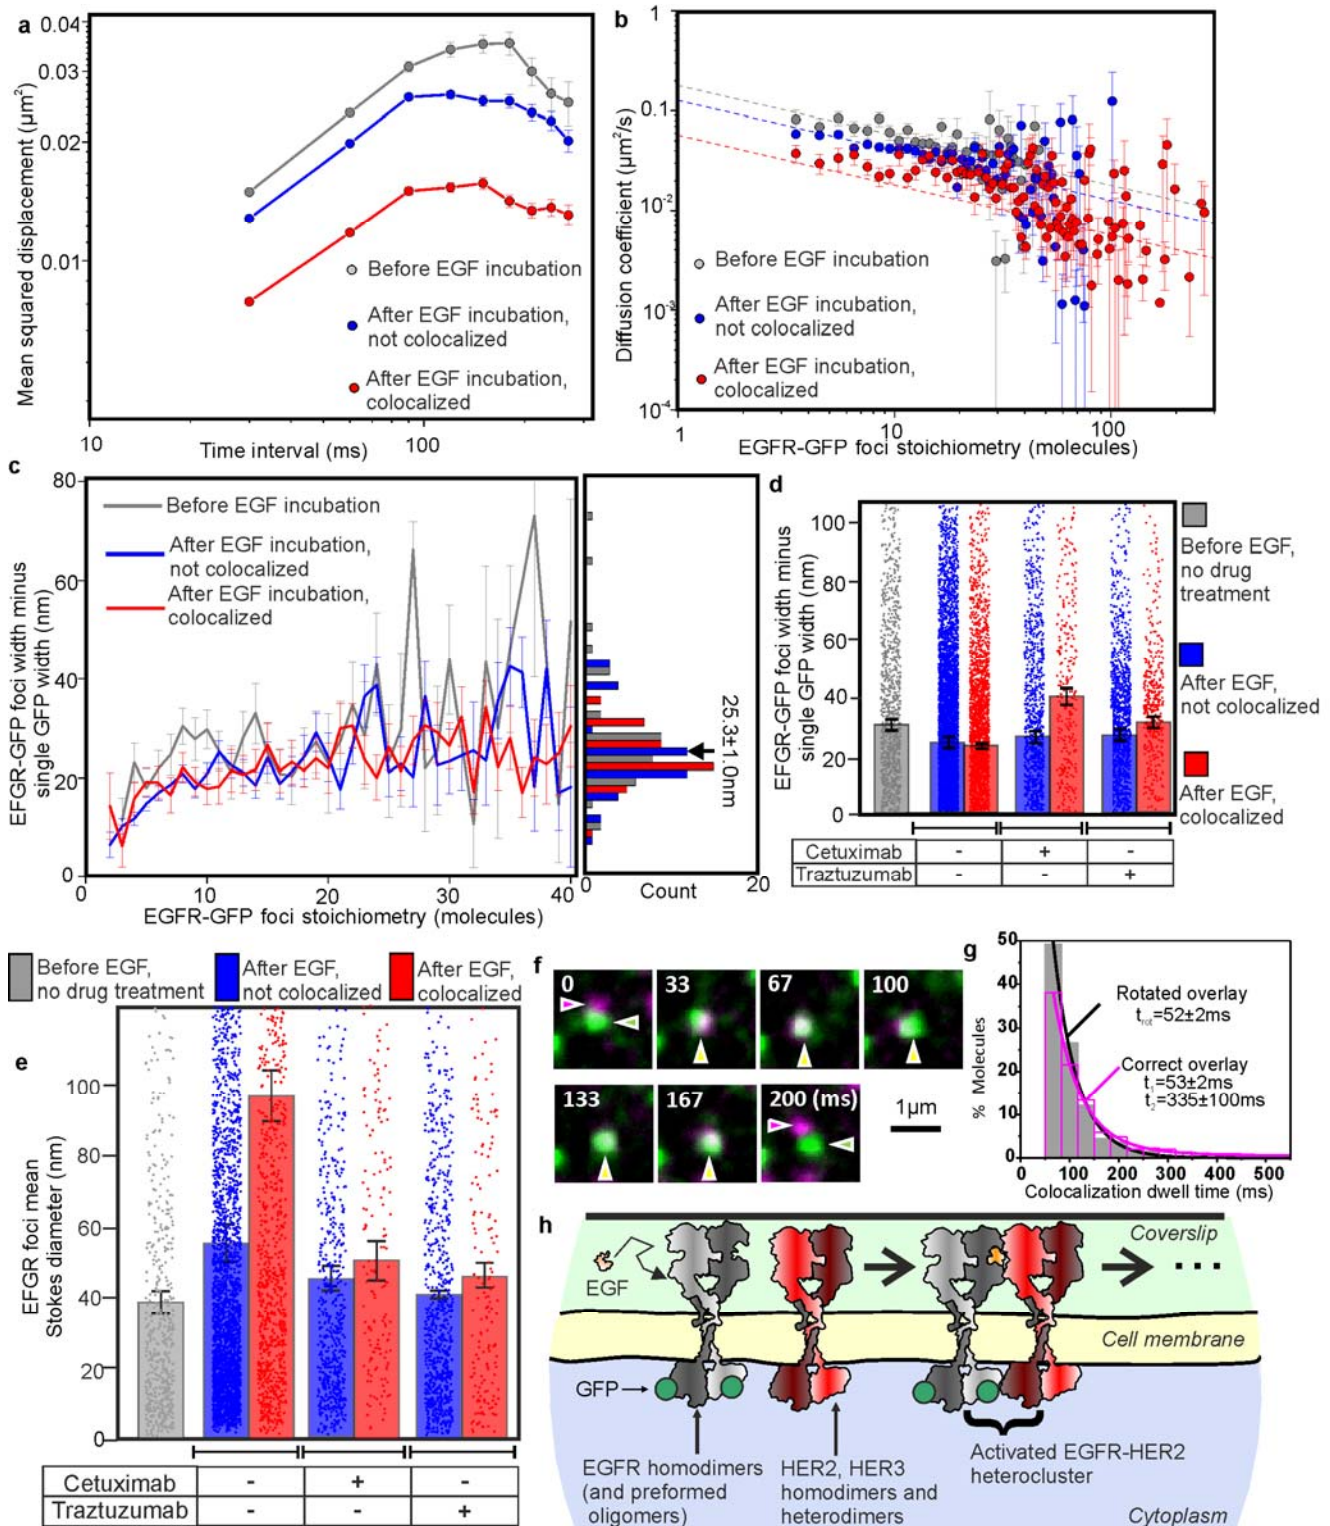

**Figure 6. EGFR mobility depends on stoichiometry and EGF binding.** (A) Log-log plot for average mean squared displacement for time intervals  $\leq 300 \text{ ms}$ ; (B) log-log plot for diffusion coefficient  $D$  with EGFR stoichiometry  $S$ , fits to Stokes-Einstein model  $D \sim S^{-1/2}$  (dashed lines). (C) EGFR-GFP foci minus single GFP width vs. stoichiometry, mean for all datasets indicated. Pre-EGF incubation (gray,  $N=770$  foci,  $N=19$  cells) and post EGF incubation for colocalized EGF-EGFR (red,  $N=1,969$  foci,  $N=117$  cells) and isolated EGFR (blue,  $N=1,741$  foci,  $N=117$  cells) shown. (D) Histograms of EGFR-GFP foci minus single GFP width. Pre EGF incubation for cells untreated with drugs (gray,  $N=1,252$  foci,  $N=19$  cells); cetuximab-treated cells post EGF incubation for colocalized EGF-EGFR (red,  $N=151$  foci,  $N=10$  cells) and isolated EGFR (blue,

338 N=1,253 foci, N=10 cells) shown; trastuzumab-treated cells post EGF incubation for colocalized  
339 EGF-EGFR (red, N=263 foci, N=27 cells) and isolated EGFR (blue, N=1,479 foci, N=27 cells)  
340 shown. Errors s.e.m. **(E)** Histogram of mean Stokes diameter upon drug treatment, same datasets  
341 as for fig. 6D, s.e.m. error bars. **(F)** Single-molecule TIRF of EGFR-HaloTag650 (magenta  
342 arrows) and HER2-GFP (green arrows) undergoing transient colocalization and co-diffusion  
343 (yellow arrows), time since start indicated. **(G)** Histogram for the dwell time of colocalized  
344 EGFR-HER2 foci. The random colocalization dwell times were estimated by measuring the  
345 apparent colocalization between the green and red channels, after the red channel was rotated by  
346 180°. The histogram for these was fitted well by a single exponential with time constant  $t_{rot}$   
347 (magenta), whereas the colocalization dwell time histogram for which there was no prior rotation  
348 of the red channel (gray) was significantly different as (Brunner-Munzel test  $P < 0.05$ ) and required  
349 the sum of two exponentials for a reasonable fit with time constants  $t_1$  and  $t_2$ . The  $t_1$  parameter  
350 was within error of  $t_{rot}$ , which we assign as random colocalization, while  $t_2$  was assigned to non-  
351 random colocalization of EGFR and HER2. 285 random and 400 non-random colocalization  
352 events detected, N=4 cells. **(H)** Schematic illustrating how HER2/HER3 and EGFR dimers might  
353 associate following EGF ligation

354  
355 We quantified EGFR-GFP foci widths by performing intensity profile analysis on  
356 background-corrected pixel values(26) and compared this with measurements from single GFP *in*  
357 *vitro*, as a function of stoichiometry  $S$  (fig. 6C). The mean EGFR-GFP foci width was greater than  
358 that of single GFP, which increased with  $S$ , consistent with a spatially extended structure. The  
359 dependence of this increase could be modelled with a heuristic power law  $S^a$  with exponent  
360  $a = 0.27 \pm 0.04$  (s.e.m.) showing no dependence with EGF ligation (fig. S6B), with mean EGFR-  
361 GFP foci minus single GFP width for all data of  $25.3 \pm 1.0$  nm (s.e.m.). At the low end of  $S$  the  
362 increase in foci minus single GFP width was ~11-12nm, while at the high end, corresponding in  
363 some cases to several hundred EGFR, the increase in width was 30-40nm. Foci widths indicated  
364 no significant differences upon addition of cetuximab or trastuzumab prior to addition of EGF  
365 ( $P > 0.05$ ), however, we observed an increase of ~50% for EGF-EGFR foci for cetuximab-treated  
366 cells ( $P < 0.001$ ) (fig. 7D). Cells treated with cetuximab or trastuzumab exhibited a similar shape  
367 for mean square displacement vs. time interval to untreated cells (fig. S7A). Both treatment  
368 groups showed reasonable agreement to a Stokes-Einstein model, with/without EGF (fig. S7b).

369 We used  $D$  to estimate the physical diameter of EGFR foci. A full analytical treatment  
370 models diffusion of membrane protein complexes as cylinders with their long axis perpendicular  
371 to the membrane surface requiring precise knowledge of local membrane thickness, however,  
372 here we simplified analysis by calculating the diameter of the equivalent Stokes sphere to  
373 generate indicative values of drag length scale. We approximated drag as  $3\pi\eta d$  where  $d$  is the  
374 sphere diameter, assuming contributions from extracellular and cytoplasmic components are  
375 negligible since the kinematic plasma membrane viscosity  $\eta$  is higher by 2-3 orders of magnitude.  
376 Using a value of ~270cP estimated from human cell lines using high precision nanoscale viscosity  
377 probes(36), indicates a mean diameter of 40-60nm for isolated EGFR. Colocalized EGF-EGFR  
378 foci had a mean diameter closer to ~90nm, reduced back to the isolated EGFR levels within  
379 experimental error upon treatment of cetuximab or trastuzumab (fig. 6E).

380 The Stokes diameter for EGFR clusters is a measure of fluorescent EGFR-GFP plus any  
381 unlabeled components contributing to drag. Here, the endogenous level of unlabeled EGFR is  
382 low. However, other studies suggest that EGFR forms heterocomplexes with other RTKs as well  
383 as recent evidence of a HER2 inhibitor lapatinib inducing HER2/HER3 heterocomplex formation  
384 in breast cancer cells(37), although the expression of HER2, HER3 and HER4, is also low.  
385 However, inclusion of HER2 in these complexes was evidenced further by performing TIRF on  
386 CHO-K1 cells with similar low endogenous EGFR expression. We constructed a dual-label cell  
387 line containing GFP labelled HER2 and EGFR labelled with HaloTag650 (HaloTag STELLA

388 Fluor 650) ligand (Methods). Using similar TIRF we found that HER2 and EGFR exhibit mobile  
389 and immobile foci, with mobility enabling transient colocalization and co-diffusion (fig. 6F over a  
390 mean non-random dwell time of  $335 \pm 100$ ms (fig. 6G, fig. S8A-C, movies S3, S4). The  
391 distributions of foci brightness for EGFR and HER2 were significantly greater than those  
392 measured for a single dye *in vitro*, consistent with a range of cluster stoichiometries beyond  
393 purely monomeric (fig. S8D).

394 Since the mean diameter of EGF-EGFR foci of  $\sim 90$ nm corresponds to a stoichiometry of  
395 approximately 16 EGFR dimers, the average diameter associated with a single dimer which  
396 accounts for the same cluster area is  $\sim 20$ nm, greater than the measured diameter of an EGFR  
397 dimer from crystal structures by a factor of 2. In other words, the observed diameter might be  
398 explained if EGFR-GFP dimers associate in a 1:1 relative stoichiometry with unlabeled dimers,  
399 presumably HER2 or HER2 associated with HER3, of similar size and structure. Although  
400 expression levels of these potential EGFR partners are low (fig. S1), only a small proportion of  
401 total cell EGFR is observed in clusters and colocalized with EGF (table S1). We observed 17  
402 colocalized foci per cell containing a mean of 527 EGFR-GFP molecules in total (table S1).  
403 However, since TIRF only excites  $\sim 1/3$  of the whole cell surface this indicates that there are  
404 approximately 1,500 EGFR-GFP molecules colocalized with EGF in total,  $\sim 0.7\%$  of the cell copy  
405 number. A proportion of 0.7% of the expressed mRNA for EGFR-GFP following addition of EGF  
406 is at level comparable to the expressed mRNA for HER2 (fig. S1). The expressed mRNA  
407 corresponding to unlabeled EGFR is also at similar levels but we have no evidence that this is  
408 incorporated preferentially in EGFR-GFP:EGF clusters. Therefore we believe heterodimers with  
409 HER2, or HER2 associated with HER3, are the most likely explanation.

410 An additional phenomenon to consider is plasma membrane invagination as EGFR  
411 clusters grow, culminating in clathrin-coated cytoplasmic vesicles. Since visible foci detected in  
412 TIRF correspond to GFP localization in the invaginated basal membrane projected laterally onto  
413 our detector, their visible diameter might appear to approach an asymptotic plateau with respect to  
414 EGFR-GFP stoichiometry, broadly what we observed (fig. 6C).

## 416 Discussion

417 Our findings from genetics, cell biology, biochemistry and biophysics, in particular single-  
418 molecule TIRF with super-resolved tracking, on live bowel carcinoma cells, suggest preformed  
419 homo-oligomeric EGFR is present in the plasma membrane prior to EGF ligation, comprising  
420 predominantly clusters of EGFR dimers (fig. 6B). We chose a bowel carcinoma cell line which  
421 does not natively express EGFR, rather than use CRISPR/Cas9 to modify a natively EGFR  
422 expressing carcinoma cell line which may have also co-evolved different expression patterns,  
423 complicating our observations of EGFR behavior. Using GFP on EGFR with TMR on EGF  
424 enabled insight into stoichiometry, mobility and kinetics of single EGFR clusters in their pre and  
425 post ligation states. Our observations indicate the most prevalent tracked EGFR oligomer in the  
426 absence of bound EGF is a hexamer, though with higher order oligomers present extending to  $\sim 90$   
427 molecules. We find that EGF ligation results in higher stoichiometry, contrary to earlier reports  
428 suggesting tetrameric EGFR is the most likely state(19). We observe that commonly used anti-  
429 cancer drugs result in changes to the EGFR content of clusters. By comparing the mobility of  
430 ligated EGFR clusters we measured cluster diameters, indicating that EGF ligation results in  
431 formation of heteroclusters containing a mixture of EGFR and HER2, or HER2 associated with  
432 HER3. These observations were consistent with TIRF on transfected CHO-K1 showing EGFR  
433 and HER2 transiently interacting over several hundred milliseconds even before EGF ligation.  
434 Using a multi-state kinetics model which investigates time-dependent EGF-EGFR interactions we  
435 find our observations are consistent with predictions based on negative cooperativity, preferential  
436 binding of EGF ligand to EGFR monomers and preferential dimerization of ligated-unligated  
437 monomers. Two important improvements in our study over earlier reports are that: (i) our findings



438 relate to a primary human carcinoma cell strain, enabling insights to the EGF pathway in cancer  
439 directly; (ii) we have definitive spatial information concerning EGFR and EGF localization  
440 simultaneously and so have confidence concerning the effects of EGF ligation on the  
441 stoichiometry of specific EGFR foci. In prior microscopy in which labelled EGF is not imaged  
442 simultaneously to labelled EGFR inference is more limited.

443 Our findings show EGFR is clustered before and after EGF ligation, consistent with  
444 observations from earlier AFM using EGF-coated tips which probed the surface of human lung  
445 adenocarcinoma cell line A549, known to have high EGFR expression(38). This study suggested  
446 half the EGFR clusters had pre-activated diameters 20-70nm, 35-105nm post activation,  
447 comparable with our measurements. However, we find important differences with respect to some  
448 previous single-molecule studies. Although there were earlier suggestions of preformed EGFR  
449 oligomers, Needham et al(19) and Huang et al(20), report putative monomeric EGFR, in  
450 particular Huang et al assign a high apparent monomeric proportion of 94%. We cannot directly  
451 exclude that monomeric EGFR are present at such high surface density in our experiments that  
452 their mean separation is less than the optical resolution, thus untrackable. However, the absence  
453 of not a single detected monomer from several thousand tracks from all datasets, despite having  
454 the sensitivity to detect single GFP (fig. S4C), makes this explanation unlikely. A more plausible  
455 explanation may lie in differences in copy number; in our experiments we estimate ~200,000  
456 EGFR molecules per cell similar to endogenously expressing cancer cell lines(39) but more than  
457 double that estimated from Needham et al and Huang et al, which may account for shifting the  
458 equilibrium position for EGFR oligomerization towards higher stoichiometries. This upshift in  
459 oligomer formation on-rate may also contribute to a depleted monomeric EGFR population in our  
460 observations, which has implications for several carcinomas in which the expression level of  
461 EGFR is known to be high.

462 Our peak value of 6 EGFR before EGF ligation cannot be explained by a model as  
463 proposed by Needham et al suggesting face-to-face dimers associate with the EGFR dimer  
464 interface between back-to-back dimers to generate higher order complexes; their model predicts a  
465 most likely stoichiometry of 4, and EGFR oligomers as extended structures which would in  
466 principle manifest as  $D \sim S^{-1}$ , whereas our mobility analysis suggests a dependence of  $D \sim S^{-1/2}$ . As  
467 discussed above, differences in copy numbers may partially explain a shift in stoichiometry to  
468 higher values. The physical driving force behind cluster formation is something we do not directly  
469 address here, however, there is evidence that forces associated with molecular crowding in the  
470 membrane may result in oligomerization of proteins and the appearance of complex cytoskeletal  
471 and clathrin pit morphologies, as well as electrostatic protein-lipid (40) and direct protein-protein  
472 interactions(41) being possible contributory factors towards EGFR cluster generation.

473 Earlier work on heterocomplex formation showed EGFR may associate with other ERBB  
474 proteins including HER2(16), however, there are discrepancies as to whether these associations  
475 are before or after EGF ligation. Our observations suggest heterocomplex formation increases  
476 following EGF ligation. Our findings that HER2-dimerization inhibitor trastuzumab influences  
477 the stoichiometry of ligated EGFR clusters might indicate a role for this drug in modulating  
478 regulatory balance through the availability of endogenous HER2 to associate with EGFR, though  
479 our experiments cannot directly exclude the presence of HER3 also. Even when scarce, the  
480 presence of HER2 is known to selectively discourage internalization and degradation of activated  
481 EGFR, and promote recycling to the plasma membrane both via chaperone proteins and EGF  
482 dissociation(42). The physiological role of heterocomplex formation is unclear. HER2 is known  
483 to act as coreceptor but has no known direct ligand. The mobility of heterocomplexes may enable  
484 a spread of signal across cell surfaces, especially if HER2 turns over between EGFR complexes  
485 as suggested by transient colocalization between HER2 and EGFR in CHO-K1. One consequence  
486 of HER2 association after EGF binding is that the whole cell signal response is more likely to be  
487 highly biphasic. The resistance of HER2-bearing complexes to downregulation also acts to sustain



488 signaling once established. Our findings of increases in hetero-complex cluster size post EGF  
489 ligation may suggest new strategies for anti-cancer drug design. For example, new drugs to target  
490 interaction interfaces between HER2 and EGFR directly. Alternatively, it may be valuable to  
491 explore new strategies to disrupt the oligomeric nature of EGFR before EGF ligation. Similarly,  
492 there may be value in using our single-molecule quantification to investigate different human  
493 carcinomas, for example those of the lung in which EGFR mutations are implicated in cancer(43).  
494 With these future studies there may also be value in pursuing CRISPR based gene-editing  
495 technologies for generating fluorescent fusions to mitigate against the risks of increased levels of  
496 unlabeled endogenous EGFR using conventional transfection methods which retain the native  
497 gene. Also, in enabling robust quantification of the actions of different cancer drugs there may be  
498 value in enabling future insights as to relative doses of each that are most efficacious in  
499 chemotherapy (i.e. a dose 'sweet-spot') in carcinomas known to be treatable using combined  
500 drugs, such as in gastric cancer(44).

## 503 **Materials and Methods**

504 **Cell lines.** Colorectal carcinoma line SW620 and CHO-K1 were both stably transfected with  
505 fluorescently tagged EGFR and HER2 using standard methods. Full details in supplementary  
506 methods.

507 **RT-qPCR.** To extract RNA, cell pellets were lysed in Trizol (Invitrogen). RNA was converted  
508 into cDNA using MMLV reverse transcriptase (New England Biolabs®) with Oligo(dT)12-18  
509 primers (Invitrogen), 10mM dNTP mix and RNase inhibitor Ribolock (Thermo Fisher Scientific),  
510 cDNA purified using QIAquick PCR purification (QIAGEN). Expression levels of *HER2*, *HER3*,  
511 *HER4* and *EGFR* were determined by qPCR using Fast SYBR Green Master Mix on QuantStudio  
512 TM 3 Real-Time PCR System (Thermo Fisher Scientific), 20s/95°C then 40 cycles of 1s/95°C  
513 and 20s/60°C, normalized against housekeeping *PLQC2*. Relative fold expression change was  
514 calculated using  $\Delta\Delta C_t$  analysis.

515 **Microarray.** Gene expression data for 78 unique, non-duplicate (not sourced from same patients)  
516 colorectal cancer cell lines were obtained by performing microarray using the Affymetrix  
517 GeneChip HG-U133 Plus 2.0 microarray, normalized using RMA and batch-removed using  
518 Partek Genomics Suite software. Full details in supplementary methods.

519 **Fab.** IgG antibodies to EGF and anti-EGF rabbit anti-mouse polyclonal IgG (Molecular Probes)  
520 were digested by papain, confirmed by migration of 28-30kDa and 25kDa proteins corresponding  
521 to reduced Fc and Fab respectively. Fab was purified using protein A immobilized within a spin  
522 column, evaluated by 280nm absorbance (Thermo Scientific NanoDrop).

523 **Confocal.** Zeiss inverted Axio Observer Z1 microscope with LSM 510 META scanning module  
524 and Plan-Aprochromat 63x 1.40NA oil immersion DIC M27 objective lens was used, enabling  
525 simultaneous imaging of green/red channels via 488nm/565nm wavelengths. SW620:EGFR-GFP  
526 cells grown in Corning 75cm<sup>2</sup> treated plastic cell culture flasks in a humidified incubator (37 °C,  
527 5% CO<sub>2</sub>) once 70-100% confluent were subcultured by trypsinization. 2-7 days prior to imaging,  
528 ~200,000 cells were seeded onto a Ibidi  $\mu$ -dish 35mm, high glass bottom using their normal  
529 culture media, DMEM, containing phenol red, then changed to DMEM with addition of 4.5g/l  
530 glucose, L-glutamine, HEPES, without phenol red, and supplemented with 10% FBS, 100  
531 units/ml penicillin and 100 $\mu$ g/ml streptomycin, or directly into DMEM without phenol red as  
532 appropriate. Prior to imaging media was changed to Molecular Probes® Live Cell Imaging  
533 Solution supplemented with 1.5mg/ml G418 sulfate.

534 For immunofluorescence we harvested SW620-EGFR-GFP cells 48h prior to fixation at ~50,000  
535 density per well seeded into Ibidi  $\mu$ -Slide VI0.4, cultured in DMEM without phenol red,  
536 supplemented with 4.5g/l glucose, L-glutamine, HEPES, 10% FBS and 100 units/ml of penicillin  
537

538 and 100 $\mu$ g/ml streptomycin, 1.5mg/ml G418. Cells were fixed with 4% formaldehyde at room  
539 temperature for 10min and washed. Non-specific antibody adsorption was blocked with 10% FBS  
540 in PBS for 10-20min. Primary antibodies were EGFR (D38B1) XP rabbit monoclonal 4267P  
541 (Cell Signaling Technology, 1:50 dilution) and anti-GFP chicken IgY (H+L) (Cell Signaling  
542 Technology, 1:400 dilution) in PBS with 10% FBS and 0.1% saponin overnight at 4 °C. Each well  
543 was washed with 10% FBS and incubated with secondary antibodies, DyLight 633 goat anti-  
544 rabbit immunoglobulin G (IgG) highly cross adsorbed (PN35563, Thermo Scientific), 1:200, and  
545 Alexa Fluor 633 goat anti-chicken IgG (H+L) 2 mg/ml (Invitrogen) in PBS with 10% FBS and  
546 0.1% saponin. Channels were washed with PBS and Sigma Aldrich Mowiol 4-88 added to  
547 solidify overnight. GFP, DyLight 633 or Alexa Fluor 633 and 4',6-diamidino-2-phenylindole  
548 (DAPI) were individually illuminated and scanned (indicating no mycoplasma). GFP was excited  
549 as for live cell imaging, while DyLight 633 and Alexa Fluor 633 were excited by a 633nm HeNe  
550 laser.

551 **TIRF.** For SW620:EGFR-GFP a dual-color single-molecule microscope was modified from a  
552 previous design(27) equipped with nanostage (Mad City Labs) and 37 °C humidified incubator  
553 supplemented with 5% CO<sub>2</sub> (INUB-LPS, Tokai Hit). We used Elforlight B4-40 473nm 40mW  
554 and Oxxius SLIM 561nm 200mW lasers attenuated into a common path prior to polarization  
555 circularization (achromatic  $\lambda/4$  plate) before entering a Nikon Eclipse-Ti inverted microscope  
556 body. An achromatic lens mounted onto a translation stage controlled the angle of incidence into  
557 the objective lens to generate TIRF via a Semrock 488/561nm BrightLine® dual-edge laser-flat  
558 dichroic beam splitter into a Nikon TIRF 100x NA1.49 oil immersion objective lens enabling  
559 simultaneous GFP/TMR detection across a 20 $\mu$ m full width at half maximum field, intensity  
560 1kW/cm<sup>2</sup>, 100nm penetration depth. Fluorescence was sampled 30ms per frame imaging onto two  
561 512x512 pixel array EMCCD cameras (Andor, iXon+ DU-897 and iXon DU-887 for green/red,  
562 piezoelectrically cooled to -70°C), 50nm/pixel magnification, via Semrock 561nm StopLine®  
563 single notch and Chroma 473nm notch filters. Typically, scans were 200 frames. For *in*  
564 *vitro* TIRF we used surface-immobilized GFP or EGF-TMR via anti-GFP or anti-EGF antibodies  
565 (Molecular Probes) or Fab followed by BSA passivation prior to washing(24). Slides were  
566 constructed from Ibidi sticky-Slides VI0.4 and 25mm $\times$ 75mm No. 1.5 D263M Schott plasma-  
567 cleaned glass coverslip and IgG/Fab applied to a single channel and incubated at room  
568 temperature for 5min, washed x3 PBS, blocked with 1mg/ml of BSA for 60min. The channel was  
569 again washed x3 then incubated with GFP for 7.5min or EGF-TMR for 4min. The channel was  
570 washed x5 before adding 1:10000, 200nm diameter, 4% w/v, Invitrogen Molecular Probes  
571 carboxyl latex beads for focusing.

572 For live cell TIRF, cells were seeded/grown in media onto glass-bottomed Petri dishes or  
573 Corning culture flasks at 37 °C, 5% CO<sub>2</sub>. SW620:EGFR-GFP, or SW620 as negative control,  
574 imaged on either i) plasma cleaned glass coverslips (25mm $\times$ 75mm No. 1.5 D263M Schott)  
575 covered by a sterile Ibidi sticky-Slide VI0.4, or ii) Ibidi  $\mu$ -dish 35mm, high glass bottom as for  
576 confocal. 48h prior to imaging, cells were seeded onto the imaging chamber at  $\sim$ 200,000/cm<sup>2</sup>  
577 density. For slides, 50 $\mu$ l (or 800 $\mu$ l for dishes) DMEM without phenol red supplemented with 10%  
578 FBS, 100 units/ml penicillin and 100 $\mu$ g/ml streptomycin was added. 24h prior to imaging media  
579 was changed to DMEM without phenol red supplemented with 100 units/ml penicillin, 100 $\mu$ g/ml  
580 streptomycin and 1.5mg/ml G418 sulfate plus inhibitors (2ng/ml cetuximab (BioVision), 10ng/ml  
581 trastuzumab (BioVision) or 20ng/ml pertuzumab (Selleck Chemicals)) where necessary, without  
582 FBS (starving cells of residual serum EGF) for 24h. We checked SW620 for expression of the  
583 most common ligands, using publicly available RNA-Seq data and our microarray data: EGF  
584 zero; TGFA low level; HBEGF low level expression; AREG zero; BTC zero; EREG zero; EPGN  
585 no data available. Although we cannot rule out the presence of very low levels of TGFA, cells  
586 were washed prior to imaging and no change was observed in EGFR clustering over 60min unless  
587 EGF was added (fig. 3) suggesting no or negligible autocrine EGFR stimulation. Immediately

588 before imaging, media was exchanged to Molecular Probes® Live Cell Imaging Solution  
589 supplemented with G418 sulfate and inhibitors where appropriate. Fluorescence sequences at  
590 5min intervals up to 60min were acquired after adding 100ng/ml (15.6nM) EGF-TMR (Molecular  
591 Probes). This EGF concentration resulted in clear phosphorylation activity on western blots and is  
592 consistent with high physiological levels found in prostate and breast tissue. Full details in  
593 supplementary methods.

594 CHO-K1 cells were illuminated using a different TIRF microscope with similar capability.  
595 Objective lens based excitation was used with an evanescent field of 100nm, and 37°C stage  
596 temperature control, around an IX-83, Olympus inverted microscope with Olympus 100× NA1.49  
597 oil immersion objective lens, laser powers 1.2mW and 5mW for 488nm and 642nm lasers. Dual  
598 color images were separated by dichroic mirrors (ZT405/488/561/640rpc-UF3, ZT561rpc-UF3  
599 and ZT640rpc-UF3; Chroma), projected into green/red detection channels with emission filters of  
600 500–550nm for HER2-mGFP (ET525/50m; Chroma) and 662.5–737.5nm (ET525/50m; Chroma)  
601 for EGFR labelled with HaloTag STELLA Fluor 650 ligand (a red fluorescent dye), then onto a  
602 two-stage microchannel plate intensifier (C9016-02MERLP24; Hamamatsu Photonics), lens-  
603 coupled to a high-speed scientific complementary metal oxide semiconductor sensor camera  
604 (C1440-22CU; Hamamatsu), 33ms per frame. For fluorescence labelling of Halo7-tagged  
605 proteins, cells were incubated with 30nM STELLA 650-conjugated HaloTag ligand (GORYO) in  
606 Ham's F12 media (Invitrogen), 37°C 20min, washed x3, and media replaced by Ham's F12 media  
607 with 2mM PIPES, pH7.0.

608 **Tracking.** For SW620:EGFR-GFP MATLAB (MathWorks)(27) code was used to track foci in  
609 green/red channels to determine spatial localization and calculate integrated pixel intensities and  
610 diffusion coefficients. The centroid of each focus was determined using iterative Gaussian  
611 masking to sub-pixel precision of 40nm, brightness calculated as the summed intensity inside a 5-  
612 pixel-radius centroid-centered circle, after subtraction of local background, signal-to-noise ratio  
613 (SNR) defined as intensity divided by background standard deviation. For SNR >0.3 (optimum  
614 for high true and low false positive detection from simulations trained on *in vitro* data) a focus  
615 was accepted and fitted with a 2D radial Gaussian to determine its sigma width. Foci detected in  
616 consecutive images separated by  $\leq 5$  pixels and not different in brightness or width by more than a  
617 factor of two were linked into the same track. For CHO-K1 foci tracking used a similar algorithm.

618 **Stoichiometry.** Stoichiometry per track was estimated in MATLAB using step-wise fluorophore  
619 photobleaching to determine GFP or TMR brightness(24) from live cells and corroborated *in*  
620 *vitro*. Live cell foci brightness followed exponential photobleaching. As each focus photobleaches  
621 it will emit the characteristic single GFP or TMR brightness value,  $I_{GFP}$  or  $I_{TMR}$ , detected as the  
622 peak of foci intensities over time. Estimates for  $I_{GFP}$  and  $I_{TMR}$  were verified by Fourier spectral  
623 analysis(24) yielding the same value within error. Initial intensity  $I_0$  was estimated by  
624 interpolation of the first 3 points in each track, stoichiometries by dividing  $I_0$  by the single-  
625 molecule fluorophore brightness, distributions rendered as kernel density estimations(24).

626 **EGFR-EGF time-dependent kinetics.** We developed a multi-state time-dependent kinetics  
627 model for ligand binding to receptor monomers and dimers, incorporating homo- and hetero-  
628 dimerization of ligated and unligated receptors, internalization of ligated receptors via  
629 endocytosis and subsequent recycling of receptors to the plasma membrane that solves multiple  
630 rate equations to determine concentrations of ligated and unligated receptor monomers and  
631 dimers, and concentrations of internalized receptors, as a function of time (full details  
632 supplementary methods).

633 **Software access.** All bespoke code in MATLAB is available from EGFRanalyser at  
634 <https://sourceforge.net/projects/york-biophysics/>.

635 **Data availability.** We do not upload additional data analysis files since analyzed data are  
636 included in full in the main text and supplementary files. All raw imaging data are available from  
637 the authors.

538 **Statistical analysis.** Two-tailed Student's *t*-tests were performed for comparisons between pairs  
539 of datasets to test null hypothesis that data in each was sampled from the same statistical  
540 distribution assuming  $(n_1+n_2-2)$  degrees of freedom where  $n_1$  and  $n_2$  are the number of data points  
541 in each distribution and by convention that *t* statistic values which have a probability of  
542 confidence  $P>0.05$  are statistically not significant. For TIRF each cell was defined as a biological  
543 replicate sampled from the cell population with sample sizes of 10-117 cells per condition.  
544 Technical replicates are not possible with irreversible photobleaching, nevertheless. Differences  
545 between colocalization dwell times were assessed using the Brunner-Munzel rank order test.

## 546 **References**

- 548 1. R. Roskoski, The ErbB/HER family of protein-tyrosine kinases and cancer. *Pharmacol.*  
549 *Res.* **79**, 34–74 (2014).
- 550 2. R. N. Jorissen, *et al.*, Epidermal growth factor receptor: mechanisms of activation and  
551 signalling. *Exp. Cell Res.* **284**, 31–53 (2003).
- 552 3. I. Lax, *et al.*, Functional analysis of the ligand binding site of EGF-receptor utilizing  
553 chimeric chicken/human receptor molecules. *EMBO J.* **8**, 421–7 (1989).
- 554 4. M. R. Schneider, E. Wolf, The epidermal growth factor receptor ligands at a glance. *J.*  
555 *Cell. Physiol.* **218**, 460–466 (2009).
- 556 5. S. Cohen, R. A. Fava, Internalization of functional epidermal growth factor:receptor/kinase  
557 complexes in A-431 cells. *J. Biol. Chem.* **260**, 12351–8 (1985).
- 558 6. M. A. Lemmon, *et al.*, Two EGF molecules contribute additively to stabilization of the  
559 EGFR dimer. *EMBO J.* **16**, 281–94 (1997).
- 560 7. M. Odaka, D. Kohda, I. Lax, J. Schlessinger, F. Inagaki, Ligand-binding enhances the  
561 affinity of dimerization of the extracellular domain of the epidermal growth factor receptor.  
562 *J. Biochem.* **122**, 116–21 (1997).
- 563 8. T. Domagala, *et al.*, Stoichiometry, kinetic and binding analysis of the interaction between  
564 epidermal growth factor (EGF) and the extracellular domain of the EGF receptor. *Growth*  
565 *Factors* **18**, 11–29 (2000).
- 566 9. K. M. Ferguson, *et al.*, EGF activates its receptor by removing interactions that autoinhibit  
567 ectodomain dimerization. *Mol. Cell* **11**, 507–17 (2003).
- 568 10. J. L. Macdonald-Obermann, L. J. Pike, The Intracellular Juxtamembrane Domain of the  
569 Epidermal Growth Factor (EGF) Receptor Is Responsible for the Allosteric Regulation of  
570 EGF Binding. *J. Biol. Chem.* **284**, 13570–13576 (2009).
- 571 11. P. Liu, *et al.*, A single ligand is sufficient to activate EGFR dimers. *Proc. Natl. Acad. Sci.*  
572 **109**, 10861–10866 (2012).
- 573 12. M. A. Lemmon, Ligand-induced ErbB receptor dimerization. *Exp. Cell Res.* **315**, 638–48  
574 (2009).
- 575 13. Y. Sako, S. Minoghchi, T. Yanagida, Single-molecule imaging of EGFR signalling on the  
576 surface of living cells. *Nat. Cell Biol.* **2**, 168–72 (2000).
- 577 14. M. Martin-Fernandez, D. T. Clarke, M. J. Tobin, S. V Jones, G. R. Jones, Preformed  
578 oligomeric epidermal growth factor receptors undergo an ectodomain structure change  
579 during signaling. *Biophys. J.* **82**, 2415–27 (2002).
- 580 15. A. H. A. Clayton, *et al.*, Ligand-induced dimer-tetramer transition during the activation of  
581 the cell surface epidermal growth factor receptor-A multidimensional microscopy analysis.  
582 *J. Biol. Chem.* **280**, 30392–9 (2005).
- 583 16. R.-H. Tao, I. N. Maruyama, All EGF(ErbB) receptors have preformed homo- and  
584 heterodimeric structures in living cells. *J. Cell Sci.* **121**, 3207–17 (2008).
- 585 17. P. Nagy, J. Claus, T. M. Jovin, D. J. Arndt-Jovin, Distribution of resting and ligand-bound  
586 ErbB1 and ErbB2 receptor tyrosine kinases in living cells using number and brightness  
587 analysis. *Proc. Natl. Acad. Sci. U. S. A.* **107**, 16524–9 (2010).



- 588 18. Y. Park, *et al.*, Single-Molecule Rotation for EGFR Conformational Dynamics in Live  
589 Cells. *J. Am. Chem. Soc.* **140**, 15161–15165 (2018).
- 590 19. S. R. Needham, *et al.*, EGFR oligomerization organizes kinase-active dimers into  
591 competent signalling platforms. *Nat. Commun.* **7**, 13307 (2016).
- 592 20. Y. Huang, *et al.*, Molecular basis for multimerization in the activation of the epidermal  
593 growth factor receptor. *Elife* **5**, e14107 (2016).
- 594 21. V. Palmieri, *et al.*, Mechanical and structural comparison between primary tumor and  
595 lymph node metastasis cells in colorectal cancer. *Soft Matter* **11**, 5719–5726 (2015).
- 596 22. J. L. Macdonald, L. J. Pike, Heterogeneity in EGF-binding affinities arises from negative  
597 cooperativity in an aggregating system. *Proc. Natl. Acad. Sci.* **105**, 112–117 (2008).
- 598 23. J. L. Wilding, S. McGowan, Y. Liu, W. F. Bodmer, Replication error deficient and  
599 proficient colorectal cancer gene expression differences caused by 3'UTR polyT sequence  
700 deletions. *Proc. Natl. Acad. Sci.* **107**, 21058–21063 (2010).
- 701 24. M. C. Leake, *et al.*, Stoichiometry and turnover in single, functioning membrane protein  
702 complexes. *Nature* **443**, 355–358 (2006).
- 703 25. A. J. M. Wollman, M. C. Leake, Millisecond single-molecule localization microscopy  
704 combined with convolution analysis and automated image segmentation to determine  
705 protein concentrations in complexly structured, functional cells, one cell at a time. *Faraday*  
706 *Discuss.* **184**, 401–24 (2015).
- 707 26. A. J. M. J. Wollman, *et al.*, Transcription factor clusters regulate genes in eukaryotic cells.  
708 *Elife* **6**, e27451 (2017).
- 709 27. I. Llorente-Garcia, *et al.*, Single-molecule in vivo imaging of bacterial respiratory  
710 complexes indicates delocalized oxidative phosphorylation. *Biochim. Biophys. Acta* **1837**,  
711 811–24 (2014).
- 712 28. M. C. Leake, D. Wilson, B. Bullard, R. M. Simmons, M. R. Bubb, The elasticity of single  
713 kettin molecules using a two-bead laser-tweezers assay. *FEBS Lett.* **535** (2003).
- 714 29. A. Sorkin, J. E. Duex, Quantitative analysis of endocytosis and turnover of epidermal  
715 growth factor (EGF) and EGF receptor. *Curr. Protoc. Cell Biol.* **Chapter 15**, Unit 15.14  
716 (2010).
- 717 30. P. Kirkpatrick, J. Graham, M. Muhsin, Fresh from the pipeline: Cetuximab. *Nat. Rev. Drug*  
718 *Discov.* **3**, 549–550 (2004).
- 719 31. K. P. Garnock-Jones, G. M. Keating, L. J. Scott, Trastuzumab. *Drugs* **70**, 215–239 (2010).
- 720 32. H.-S. Cho, *et al.*, Structure of the extracellular region of HER2 alone and in complex with  
721 the Herceptin Fab. *Nature* **421**, 756–760 (2003).
- 722 33. H. Maadi, B. Nami, J. Tong, G. Li, Z. Wang, The effects of trastuzumab on HER2-  
723 mediated cell signaling in CHO cells expressing human HER2. *BMC Cancer* **18**, 238  
724 (2018).
- 725 34. T. S. Wehrman, *et al.*, A system for quantifying dynamic protein interactions defines a role  
726 for Herceptin in modulating ErbB2 interactions. *Proc. Natl. Acad. Sci. U. S. A.* **103**,  
727 19063–19068 (2006).
- 728 35. J. Rockberg, J. M. Schwenk, M. Uhlén, Discovery of epitopes for targeting the human  
729 epidermal growth factor receptor 2 ( HER2 ) with antibodies. *Mol. Oncol.* **3**, 238–247  
730 (2009).
- 731 36. I. López-Duarte, T. T. Vu, M. A. Izquierdo, J. A. Bull, M. K. Kuimova, A molecular rotor  
732 for measuring viscosity in plasma membranes of live cells. *Chem. Commun.* **50**, 5282–  
733 5284 (2014).
- 734 37. J. Claus, *et al.*, Inhibitor-induced HER2-HER3 heterodimerisation promotes proliferation  
735 through a novel dimer interface. *Elife* **7** (2018).
- 736 38. W. Zhao, *et al.*, Mapping the resting and stimulated EGFR in cell membranes with  
737 topography and recognition imaging. *Anal. Methods* **6**, 7689–7694 (2014).

- 738 39. F. Zhang, *et al.*, Quantification of Epidermal Growth Factor Receptor Expression Level  
739 and Binding Kinetics on Cell Surfaces by Surface Plasmon Resonance Imaging. *Anal.*  
740 *Chem.* **87**, 9960–9965 (2015).
- 741 40. Y. Wang, *et al.*, Regulation of EGFR nanocluster formation by ionic protein-lipid  
742 interaction. *Cell Res.* **24**, 959–976 (2014).
- 743 41. I. Chung, *et al.*, Spatial control of EGF receptor activation by reversible dimerization on  
744 living cells. *Nature* **464**, 783–7 (2010).
- 745 42. Z. Wang, L. Zhang, T. K. Yeung, X. Chen, Endocytosis Deficiency of Epidermal Growth  
746 Factor (EGF) Receptor–ErbB2 Heterodimers in Response to EGF Stimulation. *Mol. Biol.*  
747 *Cell* **10**, 1621–1636 (1999).
- 748 43. J. G. Paez, *et al.*, EGFR mutations in lung, cancer: Correlation with clinical response to  
749 gefitinib therapy. *Science* (80-. ). **304**, 1497–1500 (2004).
- 750 44. K. Aoyagi, *et al.*, Molecular targeting to treat gastric cancer. *World J. Gastroenterol.* **20**,  
751 13741–13755 (2014).
- 752

753 **Acknowledgements:** We thank Philippe Bastiaens, Max Planck Institute of Molecular  
754 Physiology, Dortmund, Germany for donation of plasmid perbB1-EGFP-N1, Ivan  
755 R. Nabi, University of British Columbia, Canada for donation of human EGFR-YFP  
756 plasmid, and Hannah Walker and Norman Maitland for technical advice concerning  
757 cancer cell maintenance and western blotting and for use of resources at the Cancer  
758 Research Unit, University of York.

759

760 **Funding:** Work was supported by the EPSRC (EP/G061009/1), Royal Society  
761 (RG0803569, UF110111), BBSRC (BB/F021224/1, BB/N006453/1), MRC  
762 (MR/K01580X/1, PhD studentship) and CRUK (C38302/A12278).

763 **Author contributions:** DO, JW, SS, CF created and biologically characterized the cell  
764 line. OH, ILG built the microscope. CF, ILG, OH, AL, PZ collected the microscopy data.  
765 AW, CF wrote analysis software. AW, CF, AH, PZ, TCL analyzed the data. ILG  
766 performed modelling. WB and MCL designed the study. All authors wrote the manuscript.

767

768 **Competing interests:** We declare no competing interests

769

770 **Data and materials availability:** We do not upload additional data analysis files since  
771 analyzed data are included in full in the main text and supplementary files. All raw  
772 imaging data are available from the authors.

773

#### 774 **Supplementary Materials:**

775 Supplementary Materials comprise movies S1-S4 plus a single compiled PDF containing  
776 supplementary methods, table S1, titles/legends of movies S1-S4, supplementary  
777 references, and figures S1-S9:

778 Table S1. Mean EGFR foci stoichiometry.

779 Fig. S1. EGFR expression levels.

780 Fig. S2. Confocal and TIRF characterization.

781 Fig. S3. Characterization of unitary fluorophore brightness values.

782 Fig. S4. More examples of cells before addition of EGF ligand.

783 Fig. S5. Random foci overlap model.

784 Fig. S6. Characterizing EGFR and EGF foci stoichiometry after addition of EGF

785 Fig. S7. EGFR foci diffusion.

786 Fig. S8. Treatment effects on mobility

787 Fig. S8. EGFR and Her2 colocalization

788 Fig. S9. Effect of pertuzumab on EGFR foci stoichiometry  
789 Movie S1. Live transected SW620 cell single-color TIRF imaging.  
790 Movie S2. Live transected SW620 cell dual-color TIRF imaging.  
791 Movie S3. Live CHO-K1 cell dual-color TIRF imaging.  
792 Movie S4. Live CHO-K1 cell dual-color TIRF imaging zoom-in.  
793  
794  
795
